# Supplementary material for: A bio-inspired and switchable H+/OH− ion-channel for room temperature exhaled CO2 chemiresistive sensing
Source: Royal Society of Chemistry journal article supplement (doi:10.1039/d3ta04685k), 2023-01-01
Supplement: d3ta04685k1.pdf [file d3ta04685k1.pdf]

## A Bio-inspired and Switchable H<sup>+</sup>/OH<sup>-</sup> Ion-channel for Room Temperature Exhaled CO<sub>2</sub> Chemiresistive Sensing

Honghao Chen<sup>a,b</sup>, Ruofei Lu<sup>a,b</sup>, Yixun Gao<sup>a,b</sup>, Xiaorui Yue<sup>a,b</sup>, Haihong Yang<sup>c</sup>, Hao Li<sup>a,b</sup>, Yi-Kuen Lee<sup>d,e</sup>, Paddy J. French<sup>f</sup>, Yao Wang<sup>a, b \*</sup>, and Guofu Zhou<sup>a,b</sup>

<sup>a</sup> Guangdong Provincial Key Laboratory of Optical Information Materials and Technology & Institute of Electronic Paper Displays, South China Academy of Advanced Optoelectronics, South China Normal University, Guangzhou 510006, P. R. China.

<sup>b</sup> National Center for International Research on Green Optoelectronics, South China Normal University, Guangzhou 510006, P. R. China.

<sup>c</sup> Department of Thoracic Oncology State Key Laboratory of Respiratory Diseases, The First Affiliated Hospital of Guangzhou Medical University, Guangzhou 510006, P.R. China

<sup>d</sup> Department of Mechanical & Aerospace Engineering, Hong Kong University of Science and Technology, Clear Water Bay, Kowloon, Hong Kong Special Administrative Region

<sup>e</sup> Department of Electronic & Computer Engineering, Hong Kong University of Science and Technology, Clear Water Bay, Kowloon, Hong Kong Special Administrative Region

<sup>f</sup> BE Lab, Faculty EWI, Delft University of Technology, Delft 2628CD, The Netherland

\* Corresponding author: Yao Wang

E-mail addresses: [wangyao@m.scnu.edu.cn](mailto:wangyao@m.scnu.edu.cn)

### Table of contents

|                                                                                                                                  |    |
|----------------------------------------------------------------------------------------------------------------------------------|----|
| 1. Supplement to the characterization of materials.....                                                                          | 2  |
| 2. Fluorescence spectrophotometer measurement details.....                                                                       | 4  |
| 3. Response recovery curve of $\gamma$ -CD-MOF@RhB toward 1000 ppm CO <sub>2</sub> at different humidity and pH measurement..... | 7  |
| 4. Comparison with commercial IR carbon dioxide meter.....                                                                       | 8  |
| 5. Real-time detection and exhaled breath detection equipment.....                                                               | 9  |
| 6. Estimation of proton conductivity ( $\sigma$ ) and activation energy ( $E_a$ ).....                                           | 11 |

## 1. Supplement to the characterization of materials

The weak absorption peaks around  $1593\text{ cm}^{-1}$  of the FTIR plot are attributed to the  $\text{COO}^-$  asymmetric stretching vibration of RhB, TMRM and respectively. The weak absorption peaks around  $1695\text{ cm}^{-1}$  and  $1710\text{ cm}^{-1}$  of the FTIR plot are attributed to the  $\text{C}=\text{O}$  and  $\text{C}=\text{N}$  stretching vibration of RhB or TMRM respectively.<sup>40</sup>

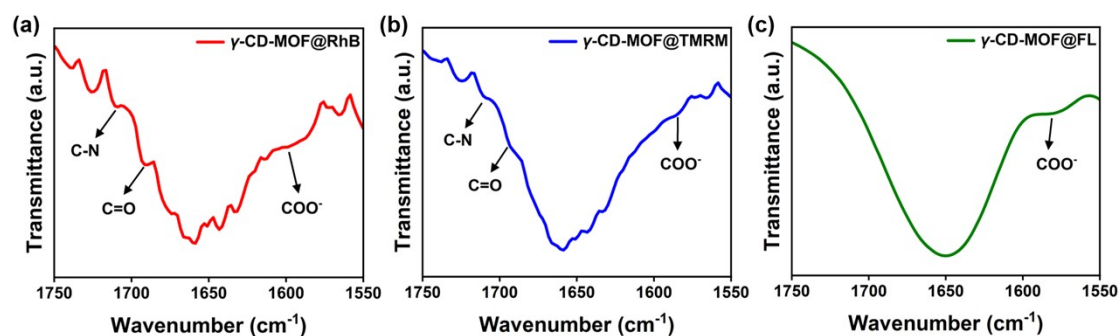

**Fig. S1** FTIR plot of (a)  $\gamma\text{-CD-MOF@RhB}$ , (b)  $\gamma\text{-CD-MOF@TMRM}$  and (c)  $\gamma\text{-CD-MOF@FL}$  with abscissa between  $1750\text{-}1550\text{ cm}^{-1}$ .

The K 2p spectrum of the  $\gamma\text{-CD-MOF}$ ,  $\gamma\text{-CD-MOF@RhB}$ ,  $\gamma\text{-CD-MOF@TMRM}$  and  $\gamma\text{-CD-MOF@FL}$  shows K-O bonds at around 293 eV (Fig. S2), indicating that  $\text{K}^+$  forms a coordination bond with the hydroxyl group of cyclodextrin.

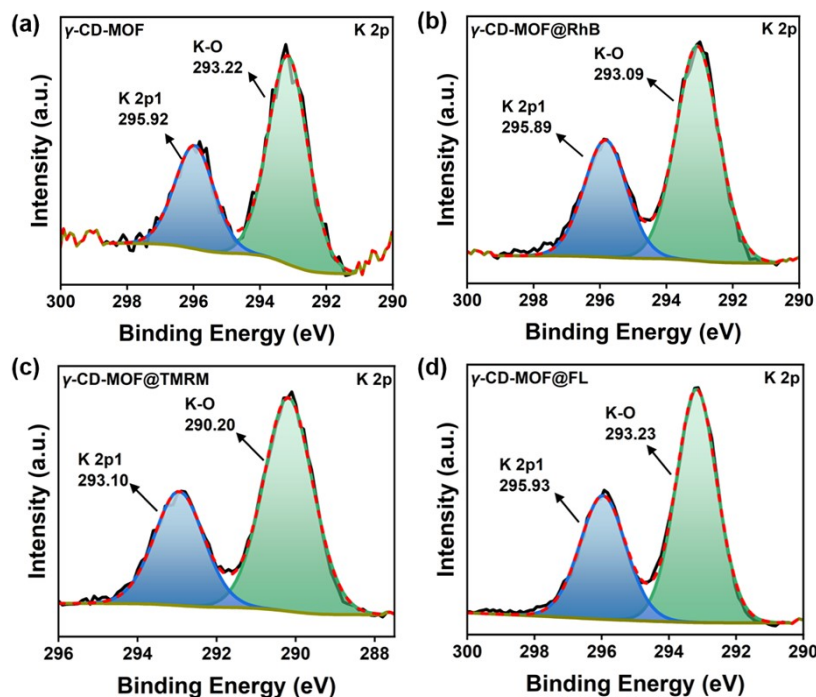

**Fig. S2** XPS spectrum of (a-d) K 2p of the  $\gamma\text{-CD-MOF}$ ,  $\gamma\text{-CD-MOF@RhB}$ ,  $\gamma\text{-CD-MOF@TMRM}$  and  $\gamma\text{-CD-MOF@FL}$ .

The C 1s spectrum of  $\gamma$ -CD-MOF@TMRM shows C-C/C=C, C-N, C-O (epoxy carbon) and C=O bonds at 284.80, 285.74, 287.35 and 288.95 eV (Fig. S3b), while its N 1s and O 1s spectrum shows the existence of C-N, C=N, C=O and C-O bonds at 398.89, 399.92, 531.33, 533.53 eV (Fig. S3a, c).

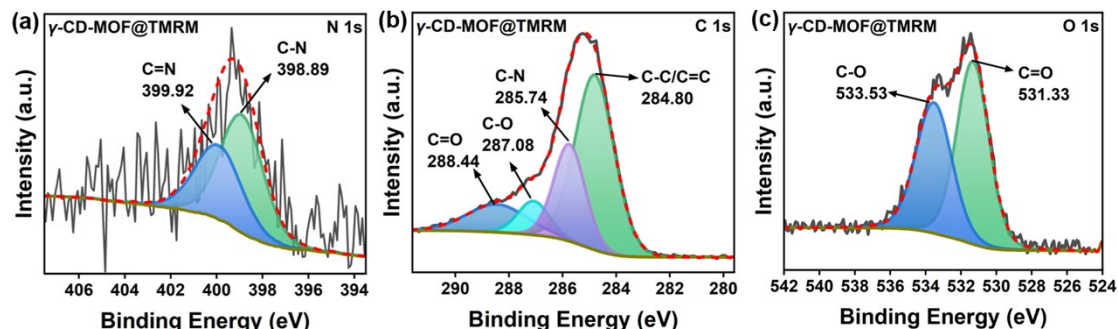

**Fig. S3** XPS spectrum of (a-c) N 1s, C 1s, O 1s of the  $\gamma$ -CD-MOF@TMRM.

The C 1s spectrum of  $\gamma$ -CD-MOF@FL shows C-C/C=C, C-O (epoxy carbon) and C=O bonds at 284.80, 286.60 and 288.50 eV (Fig. S4a), while its O 1s spectrum shows the existence of C=O and C-O bonds at 531.20, 533.40 eV (Fig. S4b).

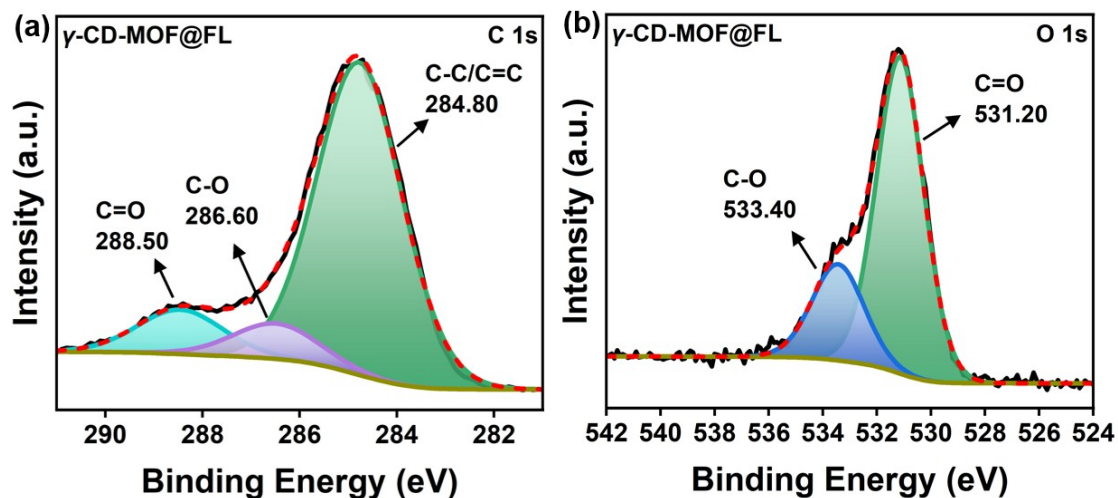

**Fig. S4** XPS spectrum of (a-b) C 1s and O 1s of the  $\gamma$ -CD-MOF@FL.

In order to illustrate the porosity of the material, nitrogen adsorption-desorption isotherms and pore size distributions of  $\gamma$ -CD-MOF and  $\gamma$ -CD-MOF@RhB were tested, and the results illustrate the microporous structures of  $\gamma$ -CD-MOF and  $\gamma$ -CD-MOF@RhB.

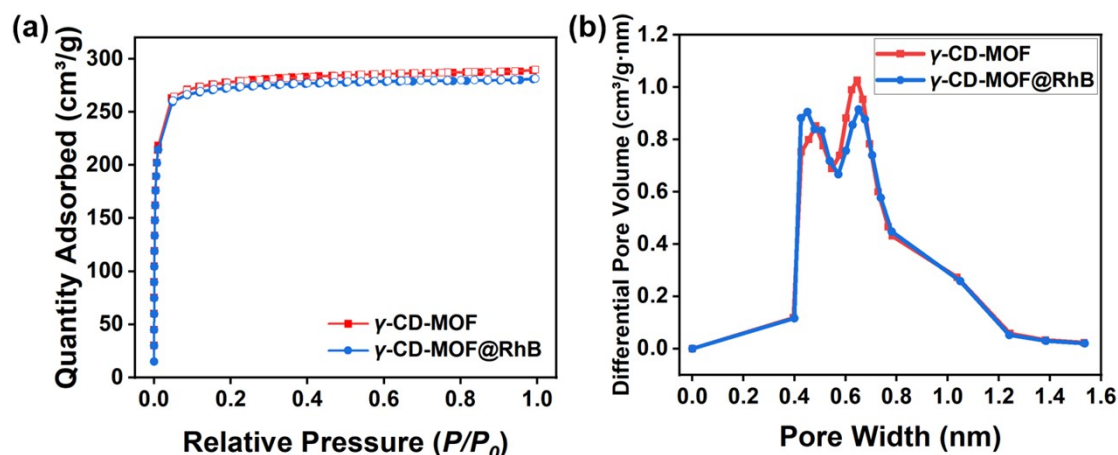

Fig. S5 (a) Nitrogen adsorption-desorption isotherms of  $\gamma$ -CD-MOF@RhB and  $\gamma$ -CD-MOF. (b) Pore size distribution of  $\gamma$ -CD-MOF@RhB and  $\gamma$ -CD-MOF.

## 2. Fluorescence spectrophotometer measurement details

To verify that fluorescein (FL) was successfully encapsulated into the  $\gamma$ -CD-MOF, fluorescence spectra were measured. As shown in Fig. S6, FL was successfully encapsulated into  $\gamma$ -CD-MOF (excitation wavelength at 478 nm and emission wavelength at 516 nm).

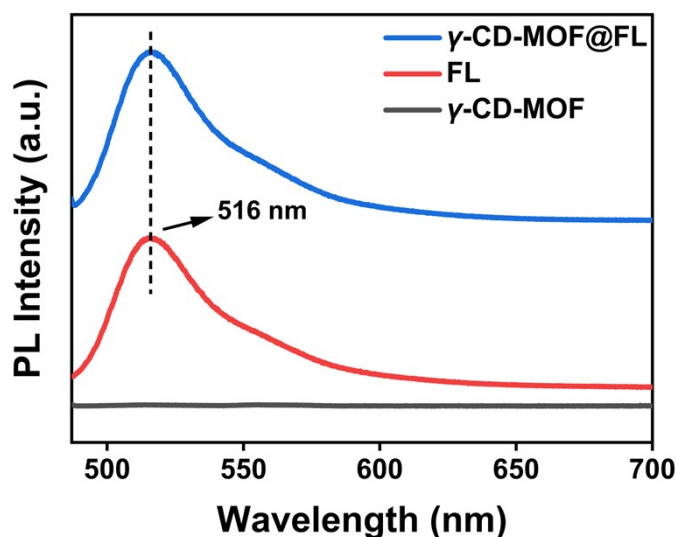

Fig. S6 Fluorescence curve of  $\gamma$ -CD-MOF, FL and  $\gamma$ -CD-MOF@FL.

Owing to verify the actual load of fluorophores in  $\gamma$ -CD-MOF, the fluorescence curves and calibration curves of RhB are shown in Fig. S7a-e. Subsequently, the fluorescence curves of composite with different feeding ratios are shown in Fig. S7f,

which can estimate the actual load of RhB in  $\gamma$ -CD-MOF according to the calibration curve (Table S1).

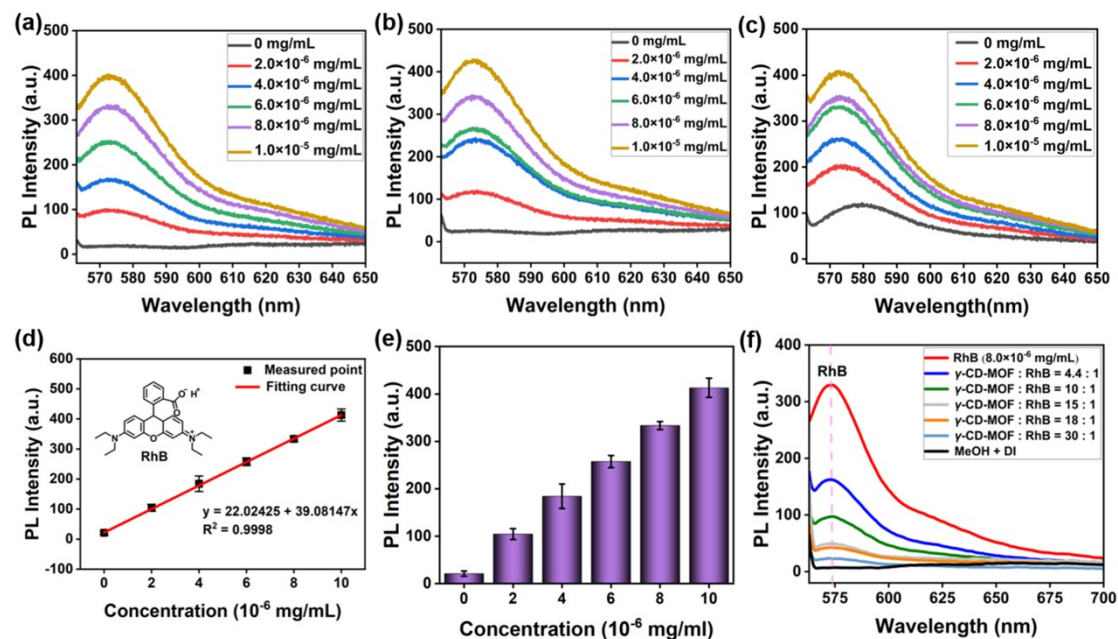

**Fig. S7** (a-c) Fluorescence curve of RhB. (d-e) RhB calibration curve drawn according to fluorescence curve. (f) Fluorescence curves of  $\gamma$ -CD-MOF@RhB with different feed ratios

The fluorescence curves and calibration curves of TMRM are shown in Fig. S8a-d. The fluorescence curves of composite with different feeding ratios are shown in Fig. S8e, the actual load of TMRM in  $\gamma$ -CD-MOF are shown in Table S1.

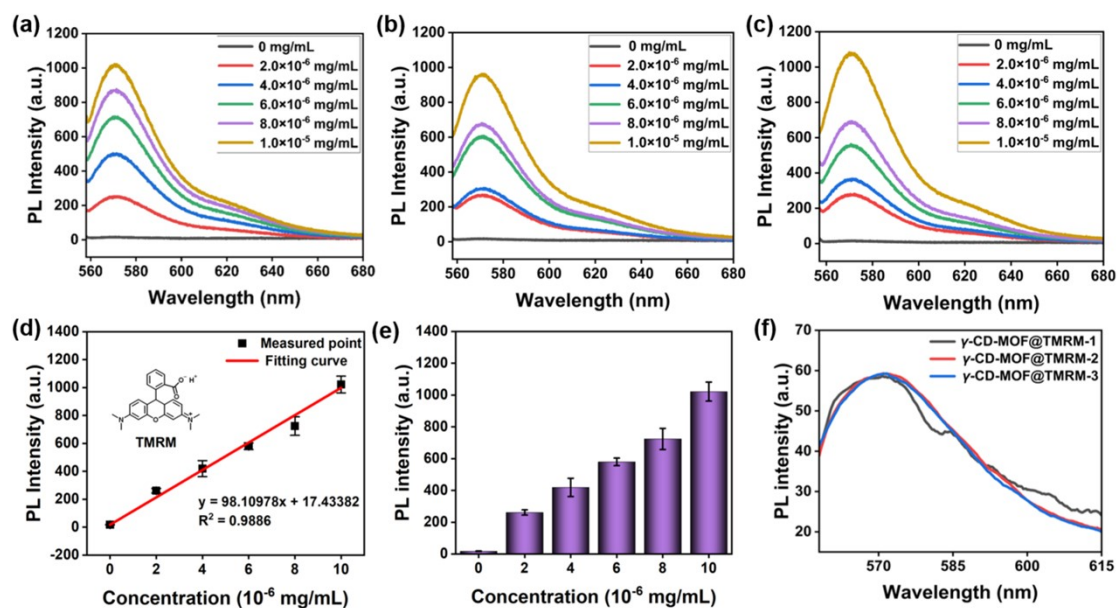

**Fig. S8** (a-c) Fluorescence curve of TMRM. (d-e) TMRM calibration curve drawn according to fluorescence curve. (f) Fluorescence curves of  $\gamma$ -CD-MOF@TMRM.



The fluorescence curves and calibration curves of FL are shown in Fig. S9a-d. The fluorescence curves of composite with different feeding ratios are shown in Fig. S9e, the actual load of FL in  $\gamma$ -CD-MOF are shown in Table S1.

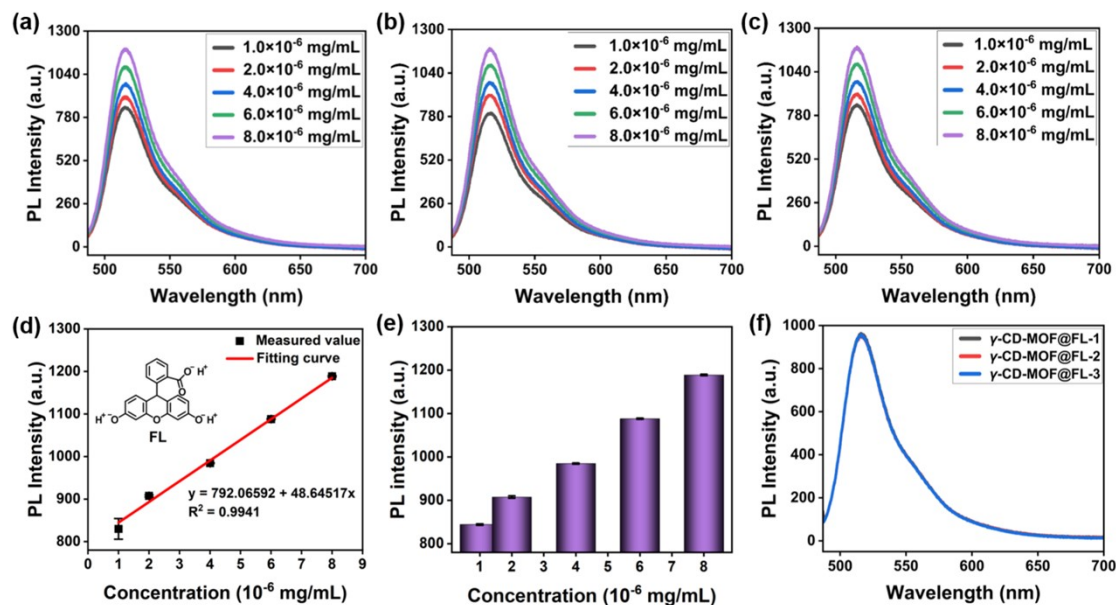

**Fig. S9** (a-c) Fluorescence curve of FL. (d-e) FL calibration curve drawn according to fluorescence curve. (f) Fluorescence curves of  $\gamma$ -CD-MOF@FL.

**Table S1.** The feeding ratio of  $\gamma$ -CD to fluorophore and the estimated molar ratio of  $\gamma$ -CD-MOF to fluorophore based on the fluorescence calibration curve.

| feed ratio<br>$\gamma$ -CD: RhB | mole ratio<br>$\gamma$ -CD-MOF:<br>RhB | feed ratio<br>$\gamma$ -CD: TMRM | mole ratio<br>$\gamma$ -CD-MOF:<br>TMRM | feed ratio<br>$\gamma$ -CD: FL | mole ratio<br>$\gamma$ -CD-MOF:<br>FL |
|---------------------------------|----------------------------------------|----------------------------------|-----------------------------------------|--------------------------------|---------------------------------------|
| 30: 1                           | 26.85: 1                               | /                                | /                                       | 40: 1                          | 26.98: 1                              |
| 18: 1                           | 11.39: 1                               | 1: 1                             | 11.32: 1                                | /                              | /                                     |
| 15: 1                           | 6.68: 1                                | /                                | /                                       | /                              | /                                     |
| 10: 1                           | 2.25: 1                                | /                                | /                                       | /                              | /                                     |
| 4.4: 1                          | 1.17: 1                                | /                                | /                                       | /                              | /                                     |

### 3. Response recovery curve of $\gamma$ -CD-MOF@RhB toward 1000 ppm $\text{CO}_2$ at different humidity and pH measurement

Owing to explore the effect of humidity, the sensor was placed at a relative humidity of 5-70 % (RH) and then the response of 1000 ppm  $\text{CO}_2$  was measured. The results show that the response value decreases with increasing humidity, which is attributed to the competition between  $\text{H}_2\text{O}$  and  $\text{CO}_2$  adsorbed on the surface of the material. This problem can be solved by drying the target gas in advance.

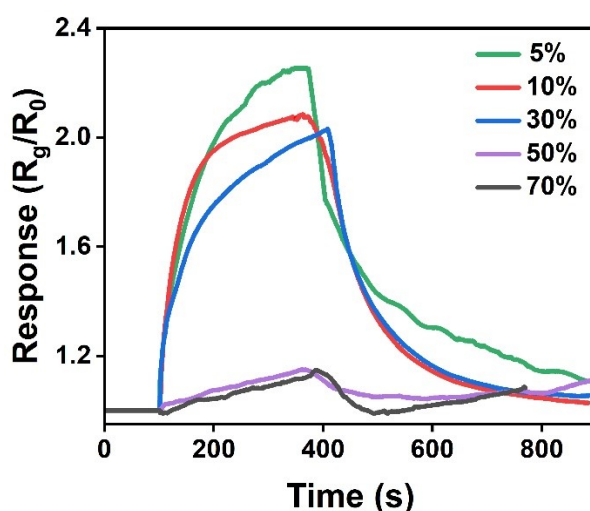

**Fig. S10** The gas sensing responses of  $\gamma$ -CD-MOF@RhB toward 1000 ppm of  $\text{CO}_2$  under 5–70% relative humidity.

To confirm the dominant type of ion-conduction, the pH of the  $\gamma$ -CD-MOF@RhB dispersion was measured. The results showed that the dispersion of  $\gamma$ -CD-MOF@RhB was alkaline.

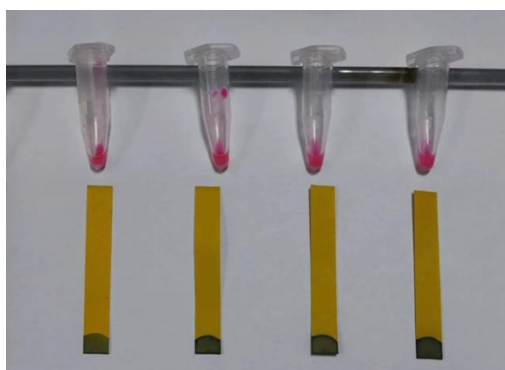

**Fig. S11** pH measurement of dispersion of  $\gamma$ -CD-MOF@RhB.

#### 4. Comparison with commercial IR carbon dioxide meter

As shown in Fig. S12, the commercial carbon dioxide meter is put into a 5 L sealed test chamber and calibrated in the test environment to obtain an initial value. Then inject different concentrations of CO<sub>2</sub>, and the difference between the reading of the concentration value after the response is stable and the initial value is the response value (Table S2).

In addition, a comparison video of sensing with commercial IR CO<sub>2</sub> meters (Vedio-1) and real-time detection video of the chemiresistive CO<sub>2</sub> sensor (Vedio-2) were provided in the supporting information.

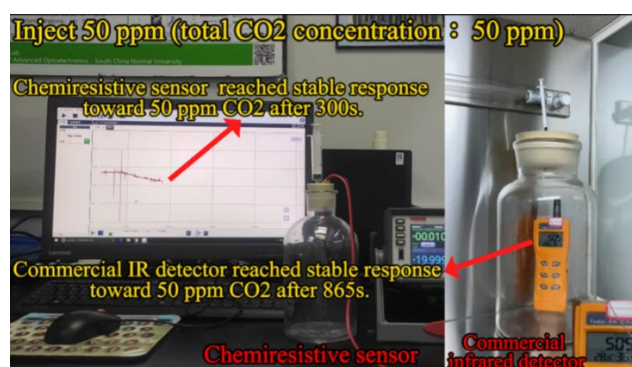

**Fig. S12** Comparison of real-time response between commercial IR carbon dioxide meter and our sensor toward 50 ppm CO<sub>2</sub>.

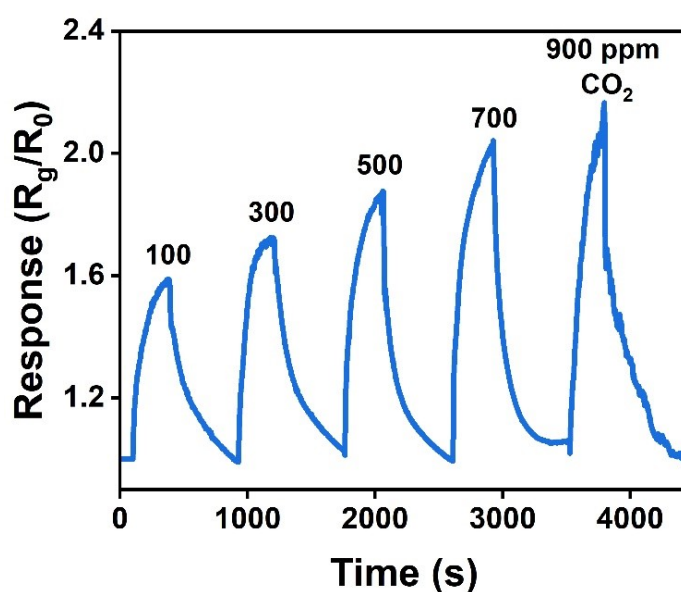

**Fig. S13** Sensing performance of our sensor toward 100-900 ppm CO<sub>2</sub>.



**Table S2.** Comparison of CO<sub>2</sub> concentration detected by our sensor and commercial IR CO<sub>2</sub> meter.

| Value of actual injected CO <sub>2</sub> (ppm) | Our sensor (ppm) | commercial IR meter (ppm) | Response time of our sensor (s) | Response time of commercial CO <sub>2</sub> meter (s) |
|------------------------------------------------|------------------|---------------------------|---------------------------------|-------------------------------------------------------|
| 100                                            | 127              | 144                       | 178                             | 960                                                   |
| 300                                            | 341              | 338                       | 132                             | 780                                                   |
| 500                                            | 531              | 547                       | 181                             | 840                                                   |
| 700                                            | 721              | 744                       | 221                             | 840                                                   |
| 900                                            | 924              | 947                       | 220                             | 1080                                                  |

## 5. Real-time detection and exhaled breath detection equipment

To further demonstrate the potential of the sensor for practical applications, real-time detection experiments were conducted on the sensor (Fig. S14). In order to avoid the influence of humidity in the exhaled breath, the exhaled breath was collected into a 1 L gas collection bag and then tested using a syringe to take a certain amount of exhaled breath via a drying device (Fig. S15). In addition, Table 3 shows the information of volunteers. The exhaled breath used in this study comes from volunteers in our research group and does not reveal personal information or involve any medical ethics.

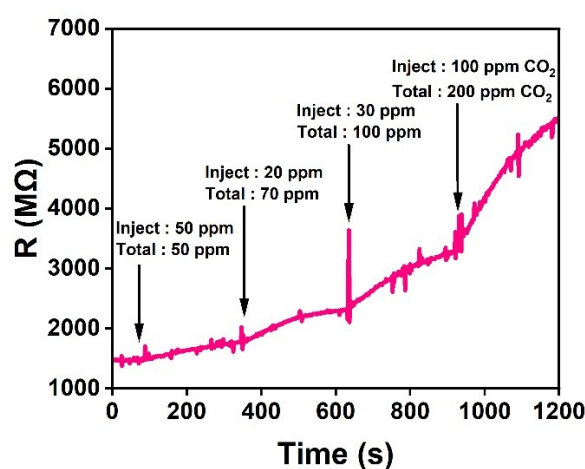

**Fig. S14** Real-time response curve of resistance toward 50-200 ppm CO<sub>2</sub>.

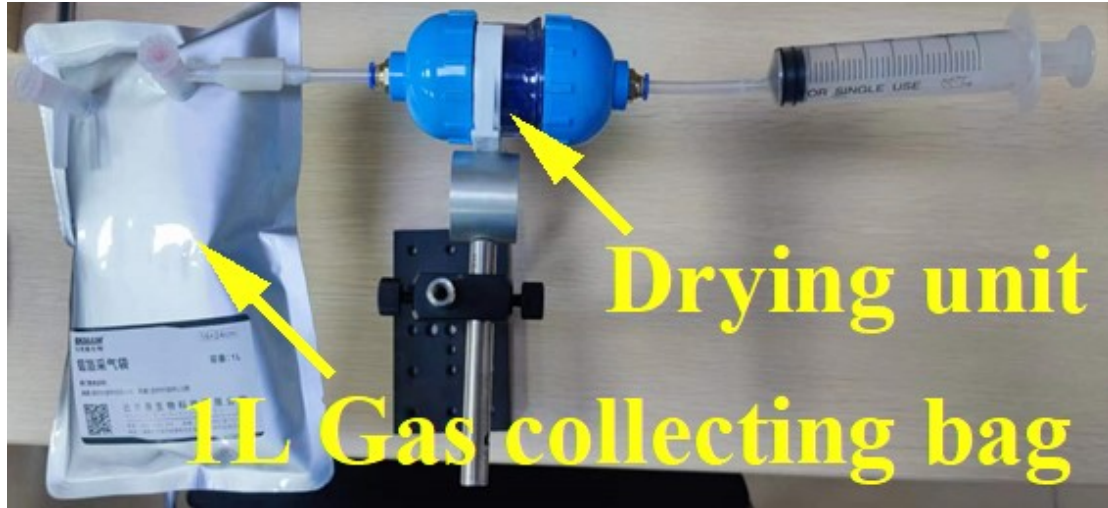

**Fig. S15** Schematic diagram of the simple drying unit.

**Table S3.** Information of volunteers.

| <b>Individual Classification</b>          | <b>No.</b> | <b>Gender</b> | <b>Age</b> | <b>Time from recovery day to breath test day *</b> | <b>Pulmonary function assessment</b> |
|-------------------------------------------|------------|---------------|------------|----------------------------------------------------|--------------------------------------|
| <b>Undiseased</b>                         | <b>1</b>   | <b>female</b> | <b>27</b>  | <b>/</b>                                           | <b>Normal</b>                        |
|                                           | <b>2</b>   | <b>male</b>   | <b>25</b>  | <b>/</b>                                           | <b>Normal</b>                        |
|                                           | <b>3</b>   | <b>male</b>   | <b>23</b>  | <b>/</b>                                           | <b>Normal</b>                        |
|                                           | <b>4</b>   | <b>male</b>   | <b>28</b>  | <b>/</b>                                           | <b>Normal</b>                        |
|                                           | <b>5</b>   | <b>male</b>   | <b>24</b>  | <b>/</b>                                           | <b>Normal</b>                        |
| <b>COVID-19 rehabilitative volunteers</b> | <b>6</b>   | <b>female</b> | <b>23</b>  | <b>2 days</b>                                      | <b>Abnormal</b>                      |
|                                           | <b>7</b>   | <b>male</b>   | <b>24</b>  | <b>3 days</b>                                      | <b>Abnormal</b>                      |
|                                           | <b>8</b>   | <b>male</b>   | <b>28</b>  | <b>2 days</b>                                      | <b>Abnormal</b>                      |
|                                           | <b>9</b>   | <b>male</b>   | <b>25</b>  | <b>3 days</b>                                      | <b>Normal</b>                        |
|                                           | <b>10</b>  | <b>male</b>   | <b>26</b>  | <b>3 days</b>                                      | <b>Normal</b>                        |

\* Recovery day is defined as the day when COVID-19 rehabilitative volunteers' antigen test shows negative.

The gas collection process can be completed in  $10 \pm 5$  s, and the total time from the start of gas collection to the completion of the gas test is about  $800 \pm 147$  s.

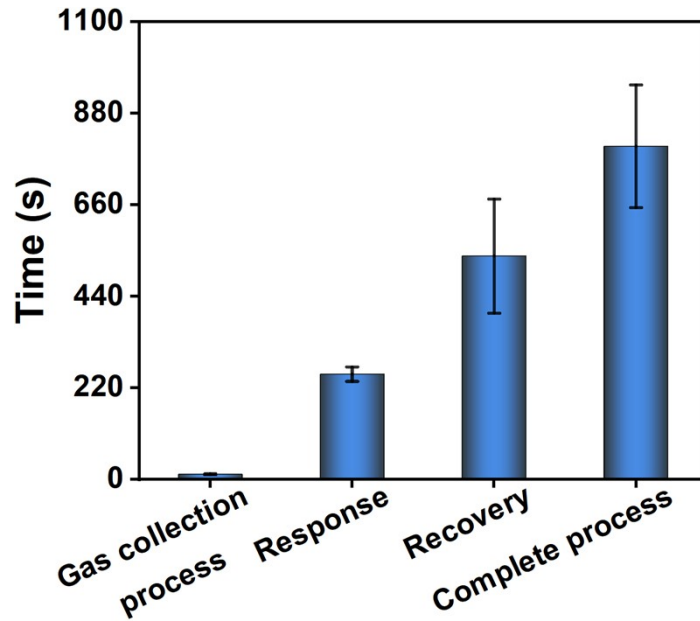

Fig. S16. Gas collection process (Including drying, extraction and injection), response, recovery and complete process times for human breath testing.

## 6. Estimation of proton conductivity ( $\sigma$ ) and activation energy ( $E_a$ ).

Calculate the proton conductivity ( $\sigma$ ) of the material by the following equation ,

$$\sigma = \frac{l}{RA}$$

where  $R$  is the sheet resistance estimated based on EIS data,  $l$  is the thickness of the sheet, and  $A$  is the cross-sectional area of the sheet. The converted conductivity value is shown in Table S3.

Arrhenius equation is used to estimate the activation energy ( $E_a$ ) of proton conduction of materials,

$$\ln(\sigma T) = \ln(\sigma_0) - \frac{E_a}{K_B T}$$

where  $\sigma_0$  is the pre-exponential factor,  $T$  is the temperature,  $k_B$  is the Boltzmann constant, which is  $8.617 \times 10^{-5}$  eV/K. Draw the relationship plot of  $\ln(\sigma T)$  to  $(1000/T)$ , and determine the  $E_a$  value of the material according to the slope of the plot (Fig. 7f).
